# Supplementary material for: Photosensing performance of branched CdS/ZnO heterostructures as revealed by in situ TEM and photodetector tests
Source: Royal Society of Chemistry journal article supplement (doi:10.1039/c4nr00963k), 2014-01-01
Supplement: c4nr00963k1.pdf [file c4nr00963k1.pdf]

## Supplementary Information

Photosensing Performance of Branched CdS/ZnO Heterostructures as Revealed by *in situ* TEM and Photodetector Tests

*Chao Zhang, Wei Tian\*, Zhi Xu\*, Xi Wang, Jiangwei Liu, Song-Lin Li, Dai-Ming Tang, Dequan*

*Liu, Qunhong Weng, Meiyong Liao, Yoshio Bando and Dmitri Golberg\**

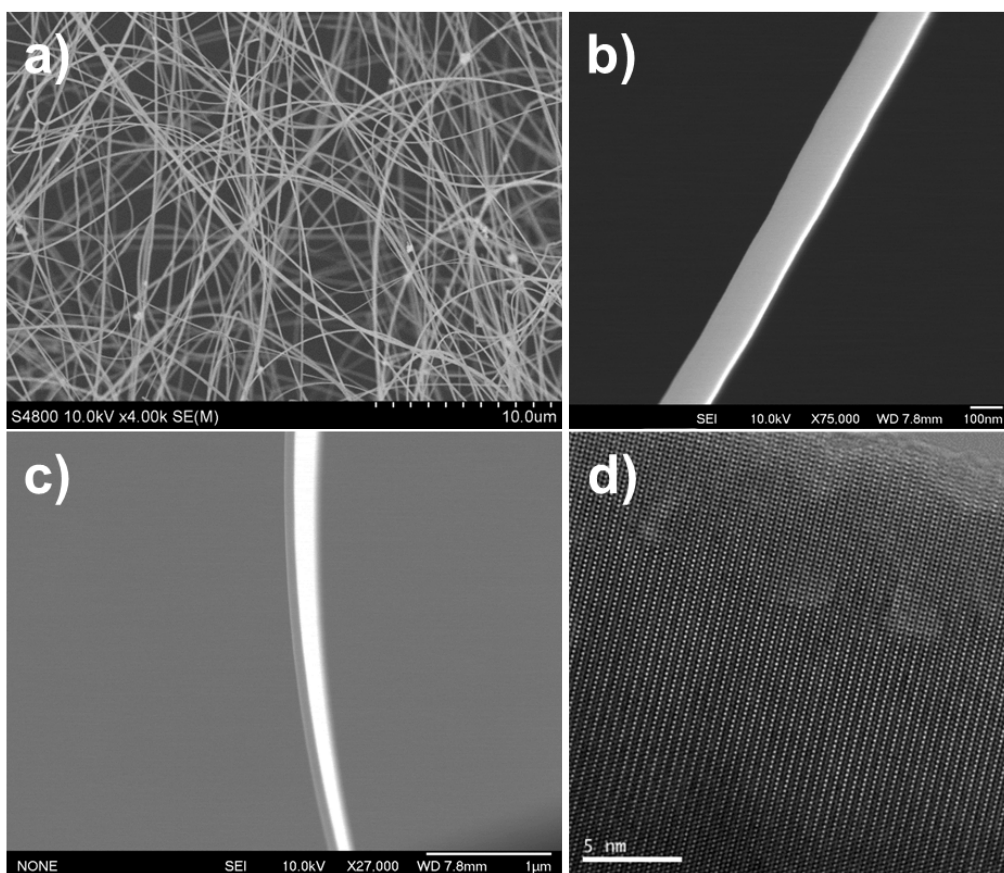

**Figure S1.** Structural characterization of a CdS nanobelt. (a) Low magnification SEM image of CdS nanostructures. (b-c) High magnification SEM images of CdS nanobelts. (d) High-resolution TEM image of the as-synthesized CdS nanobelt.

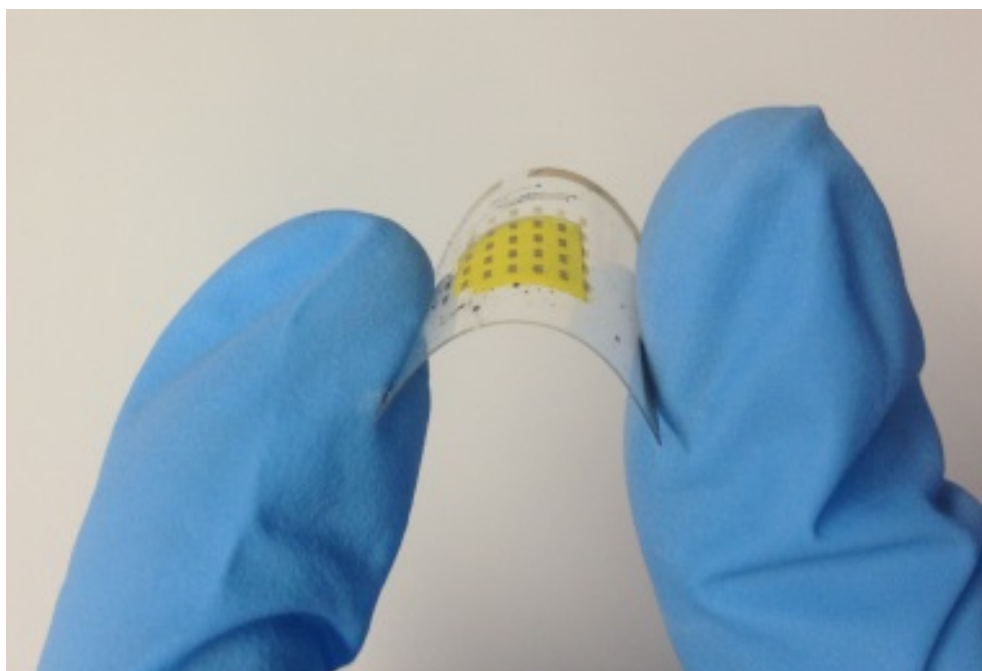

**Figure S2.** Real photo of numerous assembled PET-based flexible CdS/ZnO branched heterostructure photodetector devices.

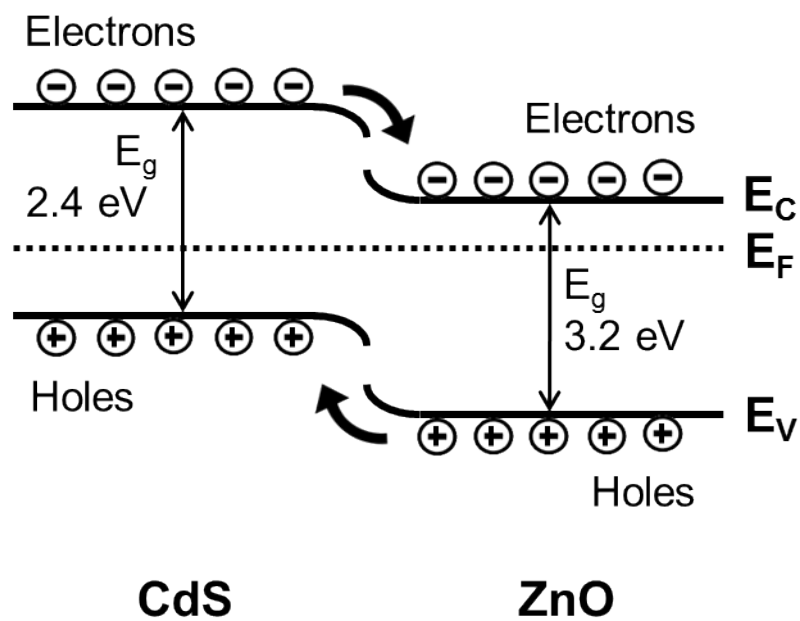

Figure S3. Schematic energy band diagram for CdS/ZnO branched nanostructure under UV illumination, showing electron-hole pair separation.
